# Supplementary material
Source: publisher figshare collection journal article supplement (https://diabetesjournals.figshare.com/ndownloader/files/22837451)

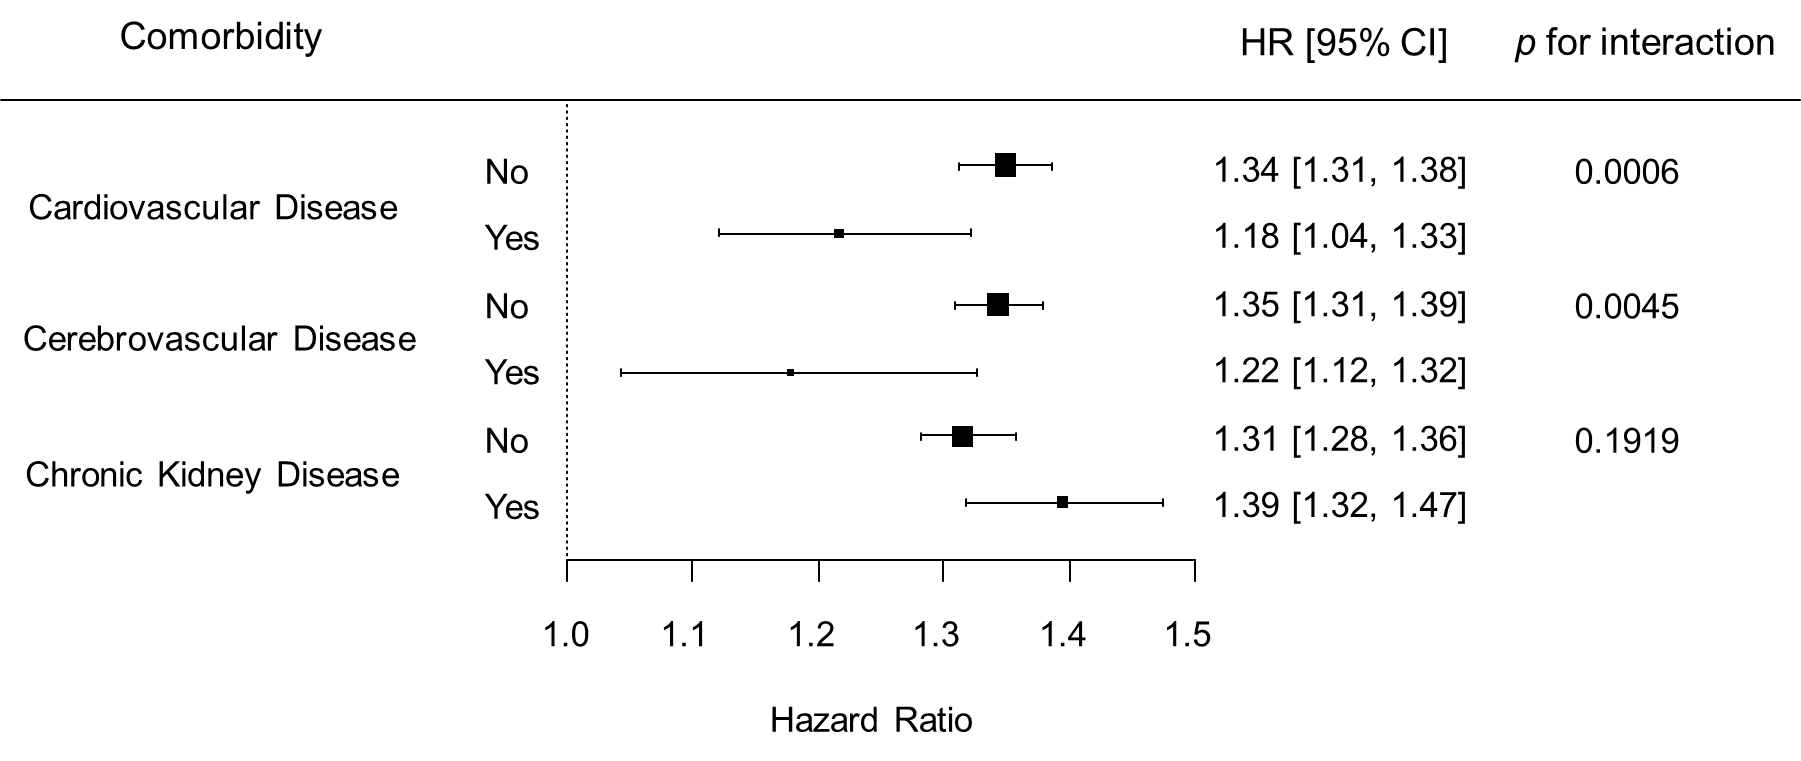


Supplemental figure 1. Subgroup analysis by comorbidity in diabetes subjects.

Supplement: Supplementary file 1 [file 22837451]
